# Supplementary material
Source: Springer Nature journal article supplement (https://www.springermedizin.de/resource/supplementary/13058_2010_2744_MOESM1_ESM.pdf/9702068)

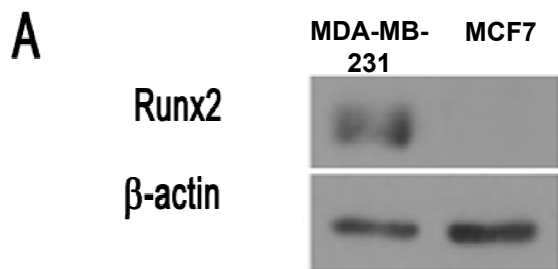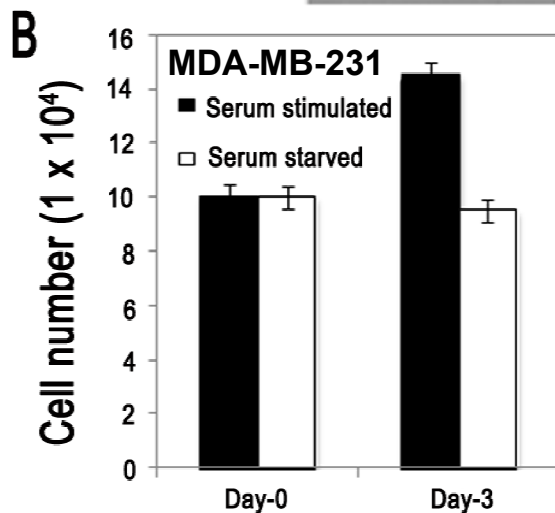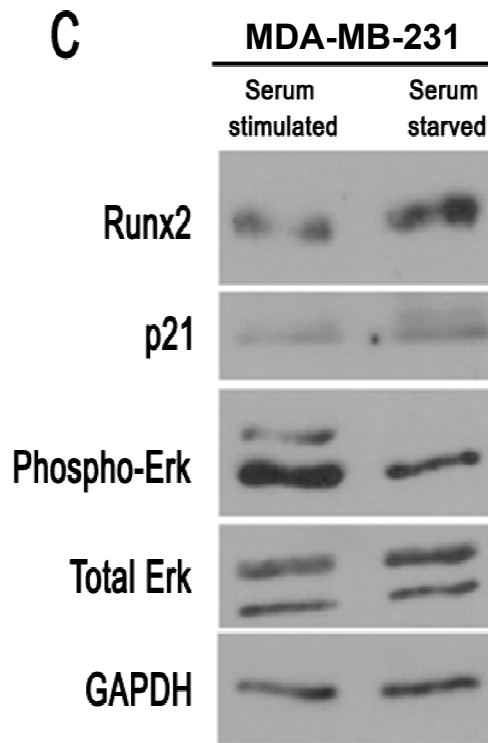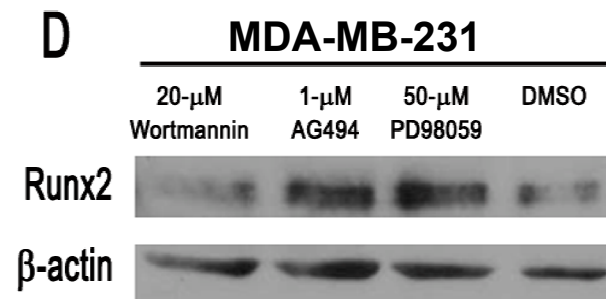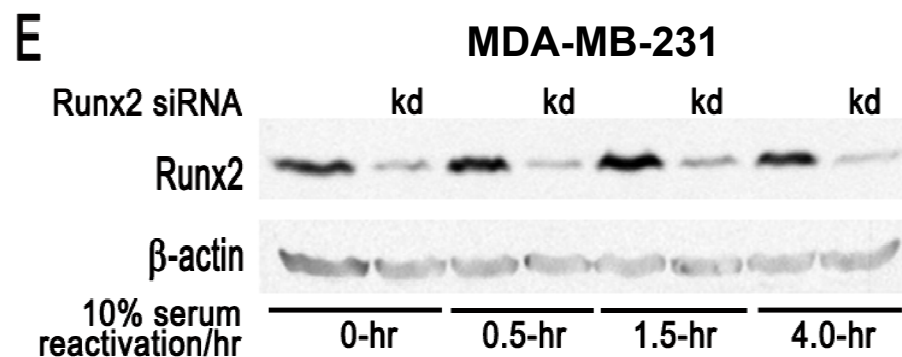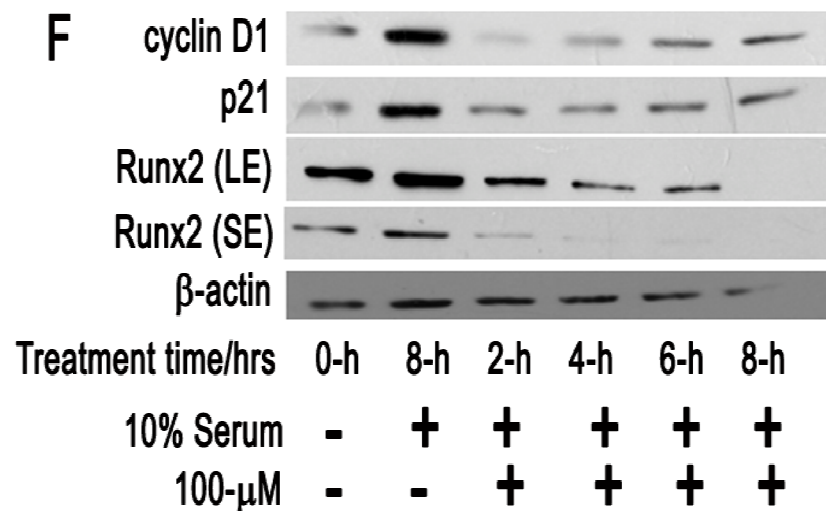

Supplement: MOESM1 [file 9702068]
